# Supplementary material
Source: PubMed Central journal article supplement (PMC2988867)
Supplement: NIHMS238496-supplement-01.pdf [file NIHMS238496-supplement-01.pdf]

A

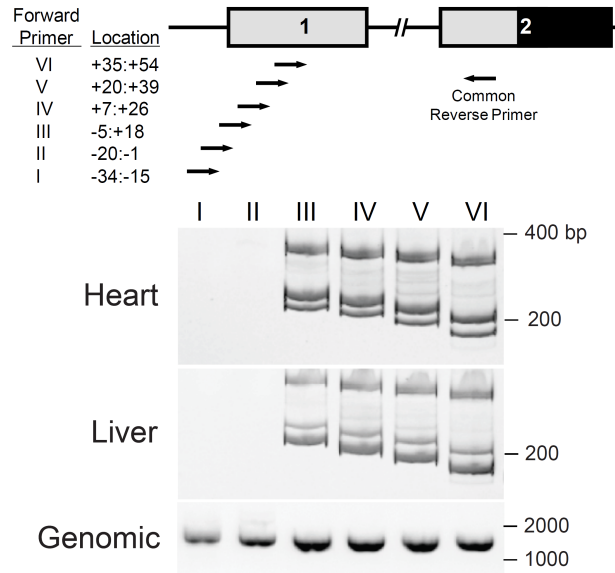

B

## Alternative RNA splicing in RGMc exon 2

|           |                                                                 |                                         |
|-----------|-----------------------------------------------------------------|-----------------------------------------|
|           | <-----Intron 1----->                                            | 251-nt exon 2 variant                   |
| Mouse     | tcttcccaagatcc-agtctgtctcattt-ttgttttggctctcttcag               | <b>ATGCTCTCTCTACCCACCATCT</b>           |
| Rat       | tcttcccaagatcc-agtctgtctcattt-ttgtcttcctctctcag                 | AT----TCTCTACCCACCATCT                  |
| Rabbit    | tctctccaaaacc--gactg-ctcatcc-tttccttgatctccccag                 | AT----TCTCTTCACAGCATCC                  |
| Human     | tctcccaaatcc-agtctg-ttcatcc-ttttcttgatctccccag                  | AT----TCACTCCACATTATCC                  |
| Dog       | tttcccaaaactcc-cgaccg-ctcatccttttctgatcttcccag                  | AT----TCTCTTCATATAATCC                  |
| Cow       | ttcccctaaactcc-agttag-ctcattc-ttttcttgatcttcccag                | AT----TCTCTTCACATCATTC                  |
| Armadillo | tctcccaaaactt---gtctt-cttatgc-tttacttgatctccccaa                | AT----TCTCTTCACAT-ACCC                  |
| Elephant  | tctcccaaaactct-ggtcct-ctcatcc-ttttcttgatcttctctg                | AT----TCTCTTCACATAACTC                  |
| Tenrec    | tctcccagactccaggacct-ctcacct-ttgtcttgatctctcag                  | AT----TCGCTTCACG-GACCC                  |
| Opossum   | tttcttttattcc-tatct--cccatca-tttctttgacctccctag                 | AT----CCCTATAACCTTTCT                   |
|           |                                                                 | 192-nt exon 2 variant                   |
| Mouse     | <b>TGACTGGTCTCCAACCCTTCTCTTTC-CCACACTCAG</b>                    | <b>CCAAATTTTC---TTCTTCCA---G TCACAG</b> |
| Rat       | TGACTAATCTTCAACCCTTCTCTTTC-CCACACGCAG                           | CCAAATTTTC---TTCTTCCG---A TCGCAG        |
| Rabbit    | TGACCAATCCTCAACTCTTCTCTTTC-TCCATGCCAG                           | CCAAATTTCTCTTTTTTTC---G TCACTT          |
| Human     | TTACCAATCTTCAATTCTTCTCTTC-TCCATGTCCAG                           | CCAAATTTTC---TTTTTTC---G TCACTT         |
| Dog       | TGAATGATCTTCGACTCTTCTCTTC-CCCATGCCAG                            | CCAAGTTTC---TTTTTTC---G TCCTTT          |
| Cow       | TGAACAATCTTCAACTCTTCTCT-TCCATGCCAG                              | CCACATTTTC---TTTTTTC---G TCCCTT         |
| Armadillo | TGACCAATCTTCAACTCTTCTCTCTCGTATGCCAG                             | CCAAATTTTC---TTTTTTC---G TCCCTT         |
| Elephant  | TGACCAATCTTCAACTCTTCTTCTCCCTATGCCAG                             | CCAAATTTTC---TTTTTTC---G TCCCTT         |
| Tenrec    | CGCCTGACC----ACCCTTCTTCTCCGCTATGCCAG                            | CCAGATTTTC---CTTCTCA---G CCCCTT         |
| Opossum   | CACTCAGACTTTGGCTCCTTACC--CAACTTCCA                              | CCAGATTTTC---CCTTTAAACAAGG TCCCTT       |
|           | Exon 2 (174-nt variant)                                         |                                         |
| Mouse     | <b>A-AGTA---CCCAGAGAAATTCAGTAGGTAGGA-GGCTCATCATCTGGGAAGAACC</b> | <b>GGTG-CCTGGGG...</b>                  |
| Rat       | A-AGTAGTACTCGGCGAAATTCAGTAGGTAGGA-GGCTCCTCATCTGGGAAGAACC        | GGTG-CCTGGGG...                         |
| Rabbit    | ACAGGACGACCGGTCAAAATTCAGTAGGTAGGAGGGCTCATCAGCTGGGAAGAAT         | CGGGG--CTGGGG...                        |
| Human     | ACAGGGCTTCCGGTCAAAATTCAGTAGGTAGGA-GGGTCATCAGCTGGGAAGAACC        | GGCG-CCTGGGA...                         |
| Dog       | ACAGGAGGTCCGGTCAAAATTCAGTAGGTAGGA-GGGTCGTCAGCTGGAAAAAGCC        | GGAG-CCTGGGG...                         |
| Cow       | ACAGGACGTCGGGTCAAAATTCAGTAGGTAGGA-GGGTCATCAGCTGGAAAGAACC        | GGAA-CCTGGGG...                         |
| Armadillo | ACAGGACGACCGGTCAAAATTCAGTAGGTAGGA-AGGTCATCAGCTGGAAAGAGCC        | GGAG-CCTGGGG...                         |
| Elephant  | ACAGGACGTCGGTCAAAATTCAGTAGGTAGGA-GGGTCATCAGCTGGAAAGAACC         | GGAG-CCTGGGG...                         |
| Tenrec    | ACAGGACCTCCGGCCCAATTCAGTAGGTAGGA-GAGTCATCAGCTGGAAAGAACC         | GGAG-CCTGGGG...                         |
| Opossum   | CCAGGGAATCCAGCCAG-----CAGCCGGAA-G-----AGAACTGGGACCAGGGG...      |                                         |
