# Supplementary material
Source: PubMed Central journal article supplement (PMC2988867)

A

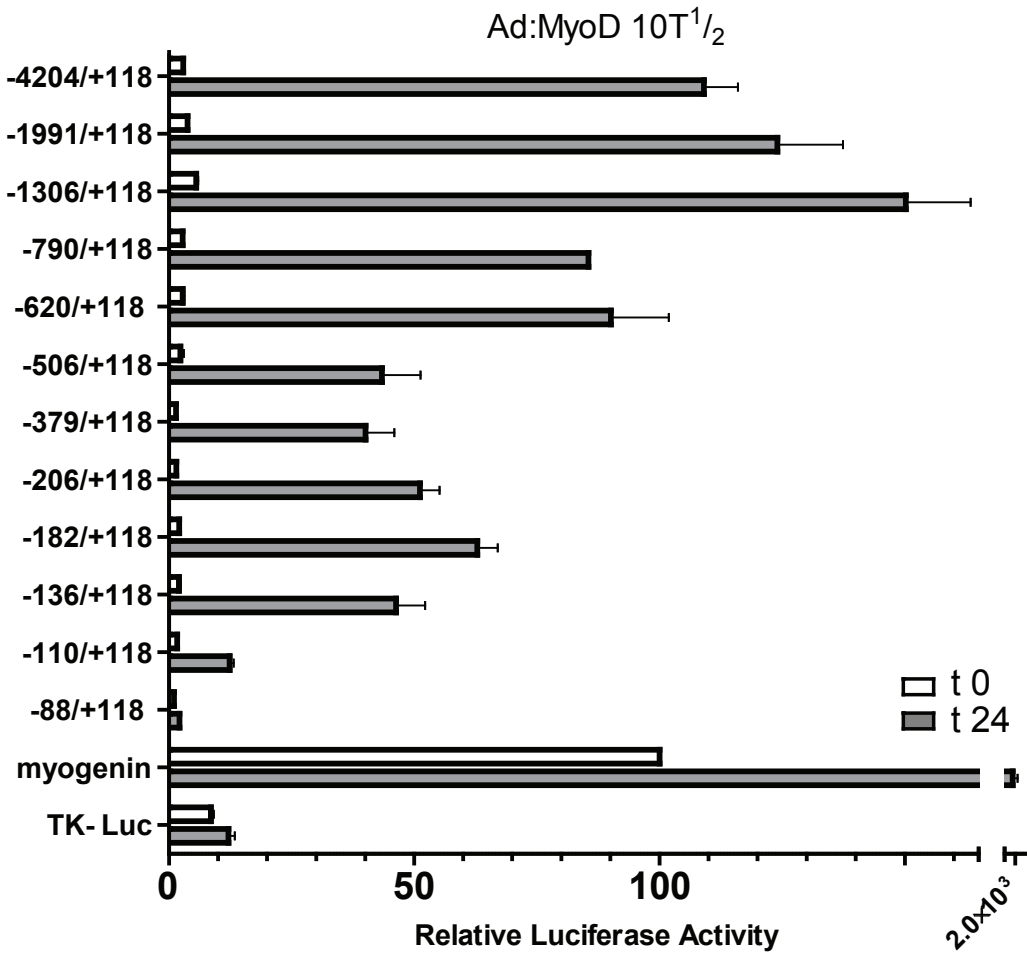

B

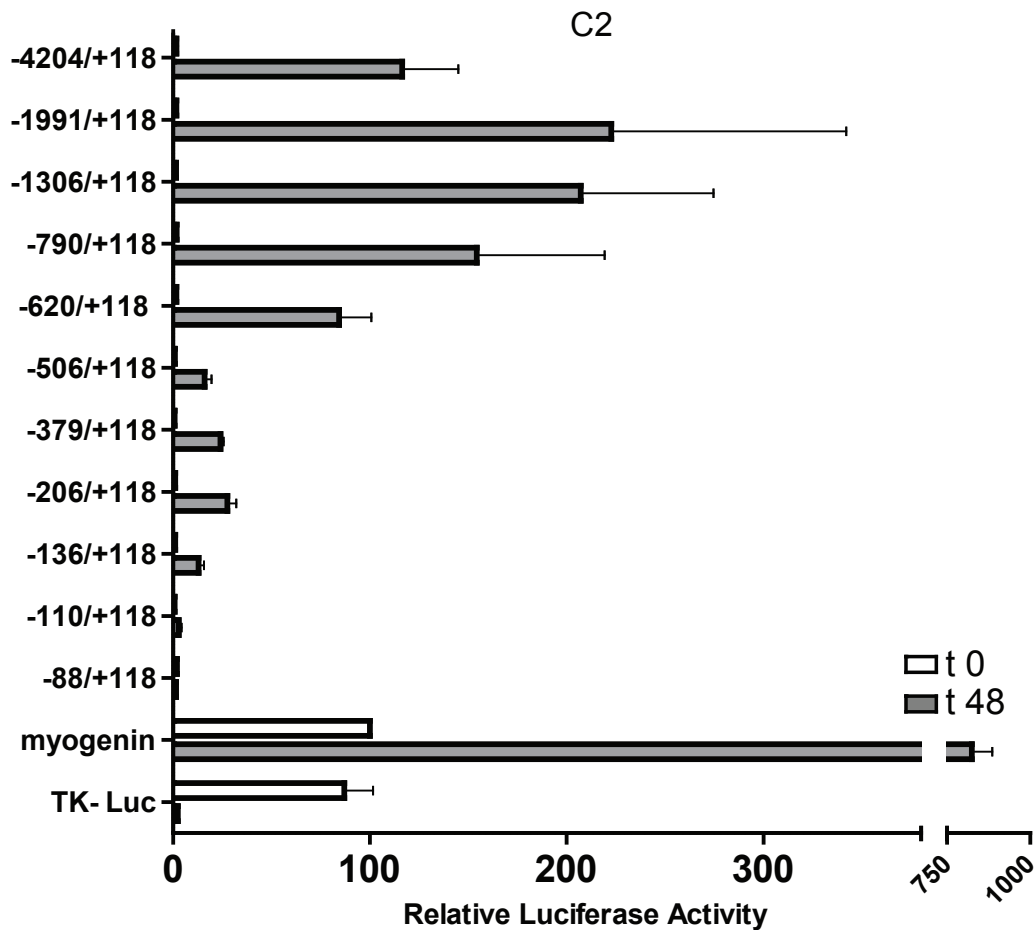

Supplement: NIHMS238496-supplement-02.pdf [file NIHMS238496-supplement-02.pdf]

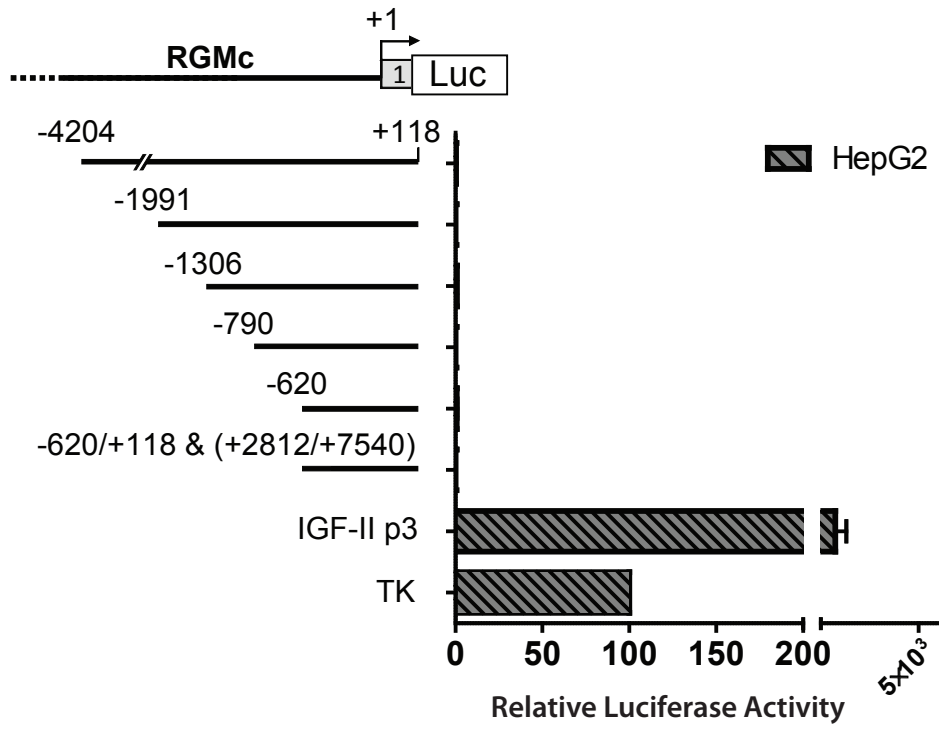

Supplement: NIHMS238496-supplement-03.pdf [file NIHMS238496-supplement-03.pdf]

*Danio rerio* (zebrafish)

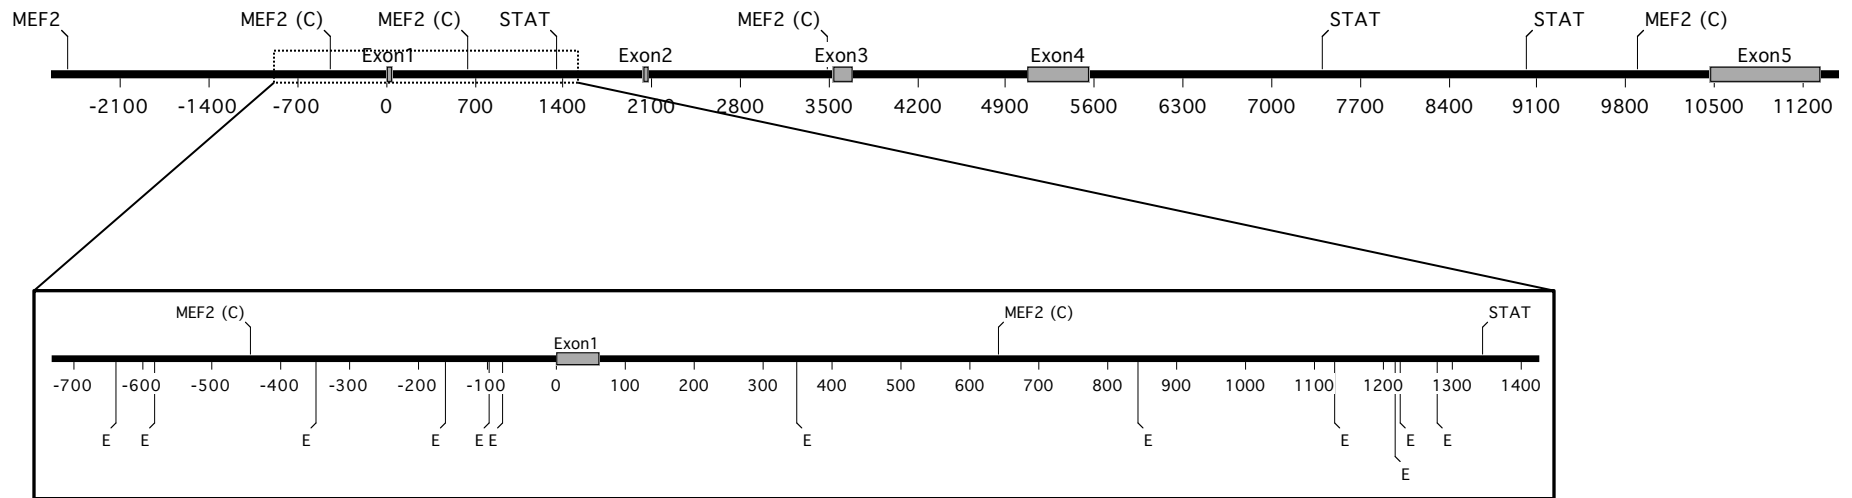

*Ciona intestinalis* (sea squirt)

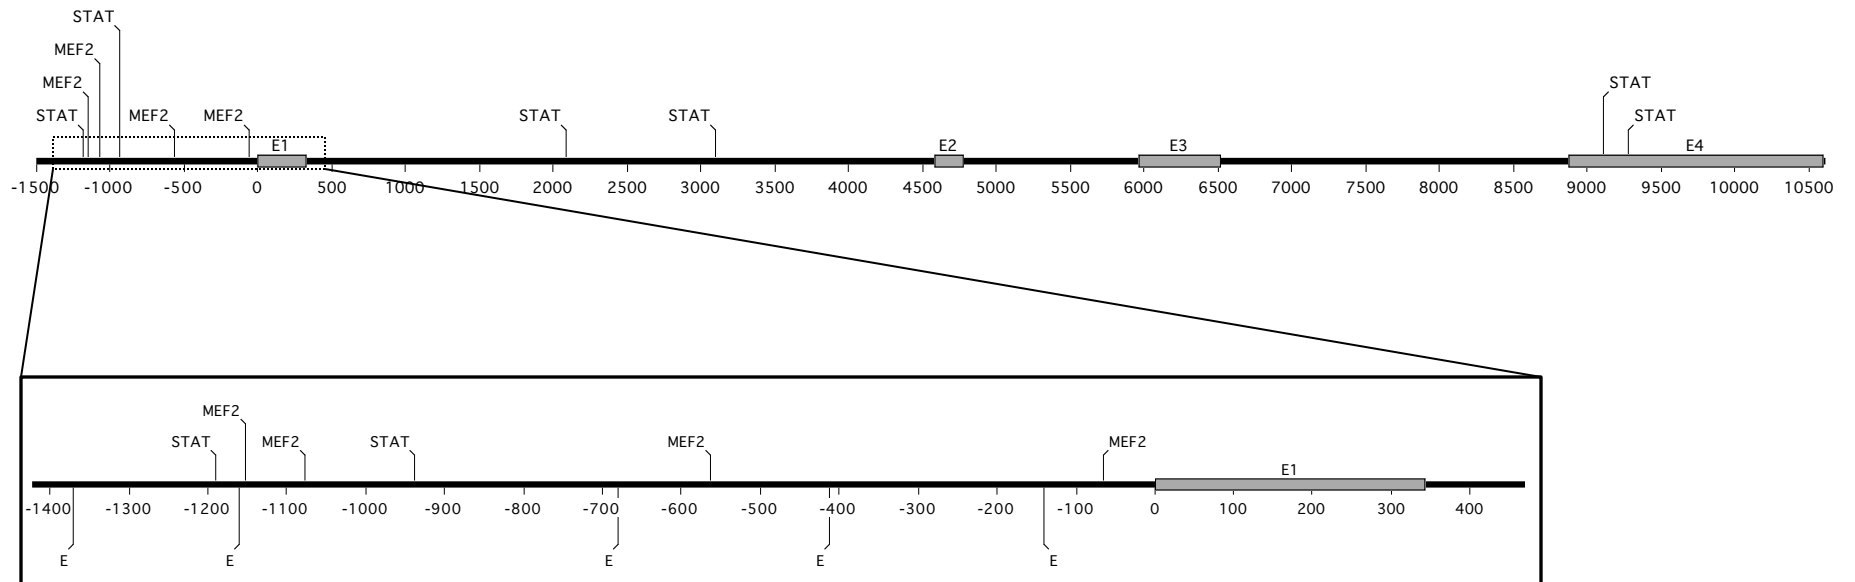

Supplement: NIHMS238496-supplement-04.pdf [file NIHMS238496-supplement-04.pdf]
